# Supplementary material for: MOF-derived hierarchical core–shell hollow Co3S4@NiCo2O4 nanosheet arrays for asymmetric supercapacitors
Source: Royal Society of Chemistry journal article supplement (doi:10.1039/d2dt00187j), 2022-01-01
Supplement: d2dt00187j1.pdf [file d2dt00187j1.pdf]

## Electronic Supplementary Information

### MOF-derived hierarchical core-shell hollow $\text{Co}_3\text{S}_4@\text{NiCo}_2\text{O}_4$ nanosheet arrays for asymmetric supercapacitors

Ye Tian,<sup>‡a</sup> Zhigao Xue,<sup>‡a</sup> Qingqing Zhao,<sup>a</sup> Jie Guo,<sup>\*a</sup> Kai Tao<sup>\*a</sup> and Lei Han<sup>a</sup>

<sup>a</sup>School of Materials Science & Chemical Engineering, Ningbo University, Ningbo,  
Zhejiang 315211, China.

Email: taokai@nbu.edu.cn; guojie@nbu.edu.cn.

### Electrochemical calculation

The specific capacitance ( $C_s$ , F/cm<sup>2</sup>) of the electrode material is calculated by following equation:

$$C_s = \frac{I \times \Delta t}{S \times \Delta V} \quad (1)$$

where  $I$  (A),  $\Delta t$  (s),  $\Delta V$  (V) and  $S$  (cm<sup>2</sup>) are the discharging current, discharging time, voltage window for charge-discharge process and area of active materials, respectively.

The specific capacitance ( $C_s$ , F/g) of the electrode material is calculated by following equation:

$$C_s = \frac{I \times \Delta t}{m \times \Delta V} \quad (2)$$

where  $I$  (A),  $\Delta t$  (s),  $\Delta V$  (V) and  $m$  (g) are the discharging current, discharging time, voltage window for charge-discharge process and mass of active materials, respectively.

The charge storage mechanism and reaction kinetics were analysed by the formula as follows:

$$i = av^b \quad (3)$$

where  $I$  (A),  $v$  (mV s<sup>-1</sup>),  $a$  value and  $b$  value are peak current, scan rate, constant and constant, respectively. When  $b = 0.5$ , the material storage mechanism is considered as battery type. When  $b=1$ , the material storage mechanism is considered as capacitive character.

The capacitive ( $k_1v$ ) and diffusion-controlled ( $k_2v^{1/2}$ ) currents are separated by following equation:

$$i = k_1 v + k_2 v^{1/2} \quad (4)$$

In the two-electrode test, the positive and negative charges should be balanced, so the mass of positive and negative active substances is as follows:

$$Q_- = m_- \times C_- \times \Delta V_- = m_+ \times C_+ \times \Delta V_+ = Q_+ \quad (5)$$

Where  $m$  (g),  $C$  (F/g) and  $\Delta V$  (V) are active materials, specific capacitance, and charge-discharge voltage of positive and negative electrodes, respectively.

The energy density ( $E$ , Wh/kg) and power density ( $P$ , W/kg) calculation equation of Co<sub>3</sub>S<sub>4</sub>@NiCo<sub>2</sub>O<sub>4</sub>/rGO/NF//AC/NF cell is as follows:

$$E = \frac{C_s \times (\Delta V)^2}{2 \times 3.6} \quad (6)$$

$$P = \frac{3600 \times E}{\Delta t} \quad (7)$$

Where  $C$  (F/g),  $\Delta t$  (s) and  $\Delta V$  (V) are specific capacitance, discharging time and working voltage of Co<sub>3</sub>S<sub>4</sub>@NiCo<sub>2</sub>O<sub>4</sub>/rGO/NF//AC/NF cell, respectively.

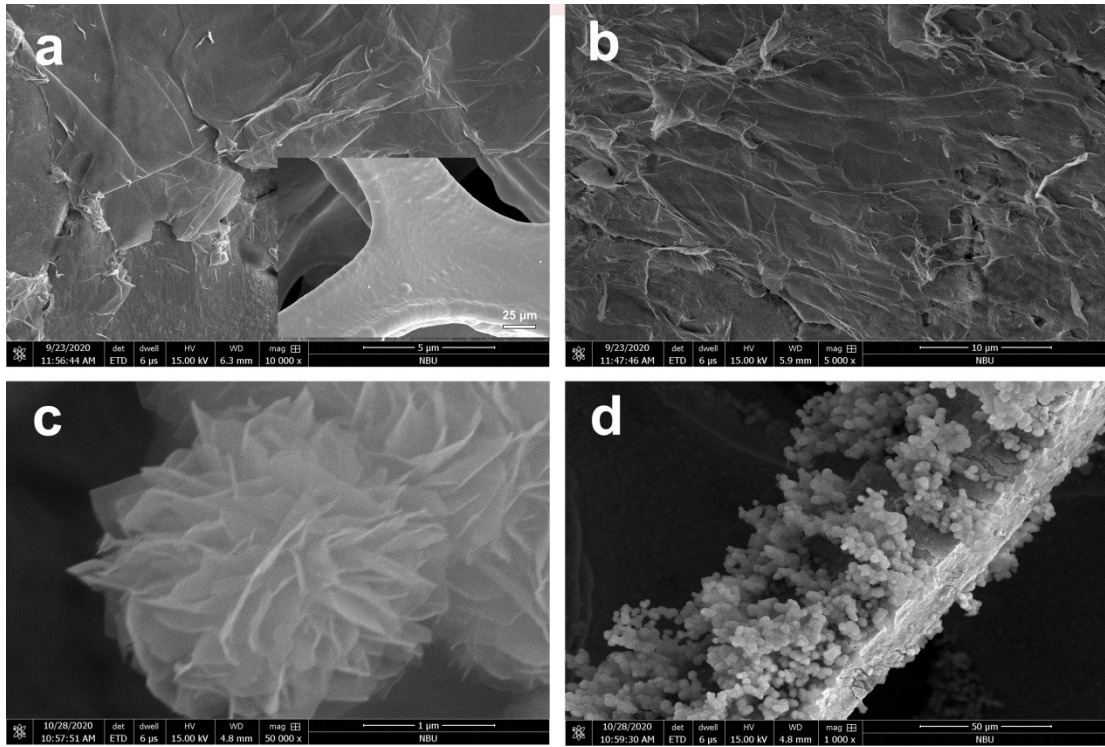

**Fig. S1** SEM images of sample. (a,b) rGO/NF, inset: bare NF; (c,d) NiCo<sub>2</sub>O<sub>4</sub>/rGO/NF.

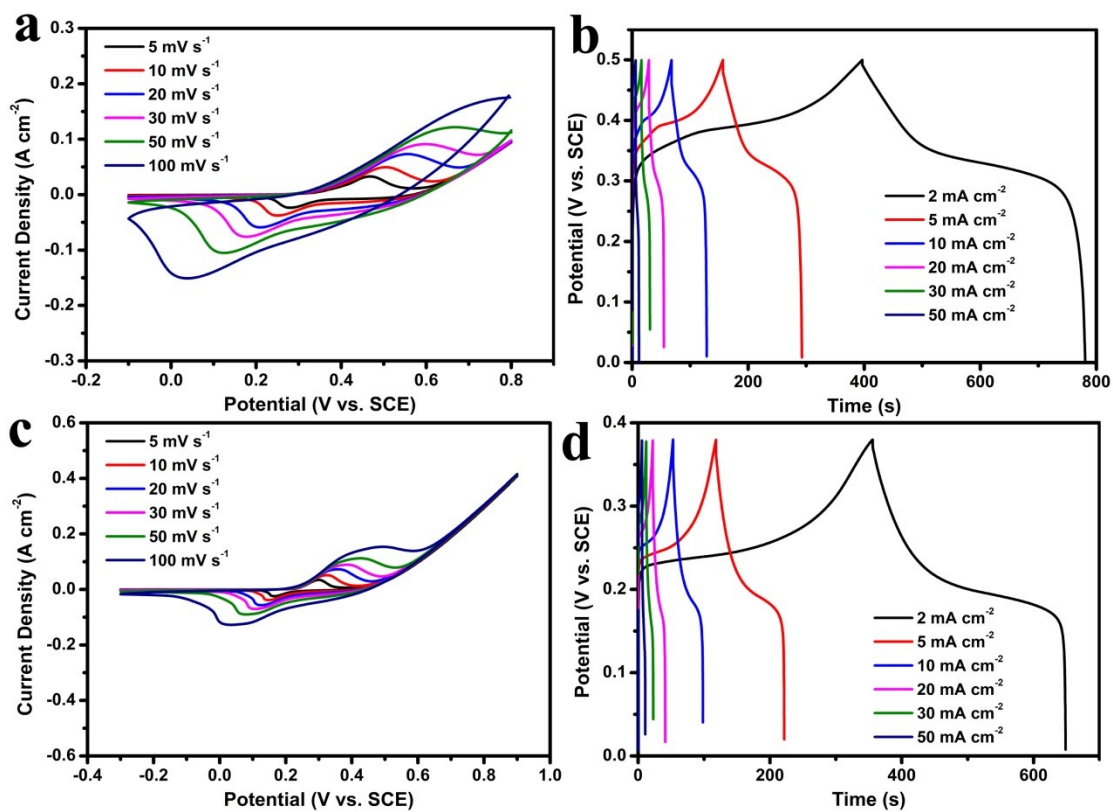

**Fig. S2** (a) CV curves of the  $\text{Co}_3\text{S}_4/\text{rGO}/\text{NF}$  at different scanning rates. (b) GCD curves of the  $\text{Co}_3\text{S}_4/\text{rGO}/\text{NF}$  at different current densities. (c) CV curves of the  $\text{NiCo}_2\text{O}_4/\text{rGO}/\text{NF}$  at different scanning rates. (d) GCD curves of the  $\text{NiCo}_2\text{O}_4/\text{rGO}/\text{NF}$  at different current densities.

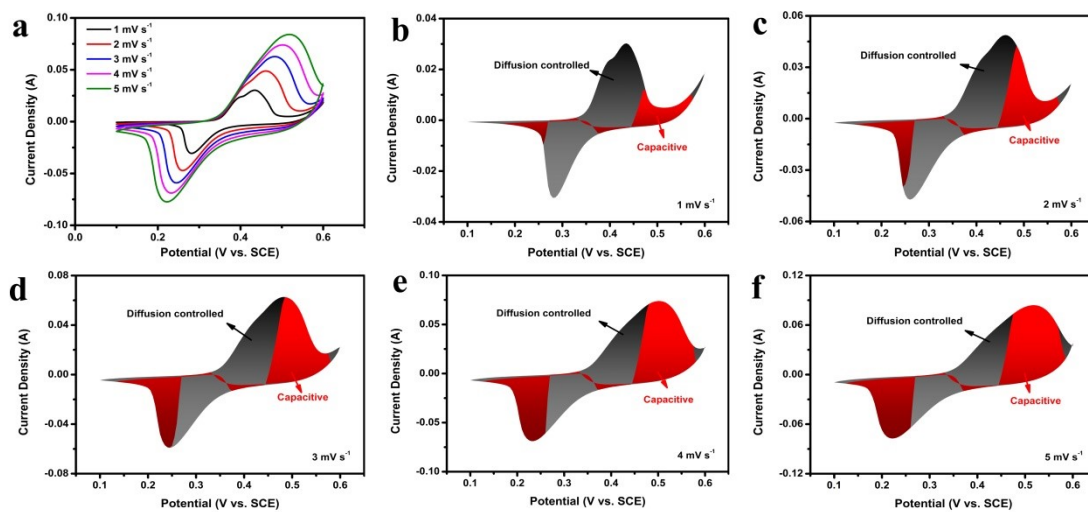

**Fig. S3** (a) CV curves of the  $\text{Co}_3\text{S}_4@\text{NiCo}_2\text{O}_4/\text{rGO}/\text{NF}$  at different scanning rates. CV curves with capacitive fraction shown by the shaded area at a scan rate at (b) 1  $\text{mV s}^{-1}$ , (c) 2  $\text{mV s}^{-1}$ , (d) 3  $\text{mV s}^{-1}$ , (e) 4  $\text{mV s}^{-1}$  and (f) 5  $\text{mV s}^{-1}$ .

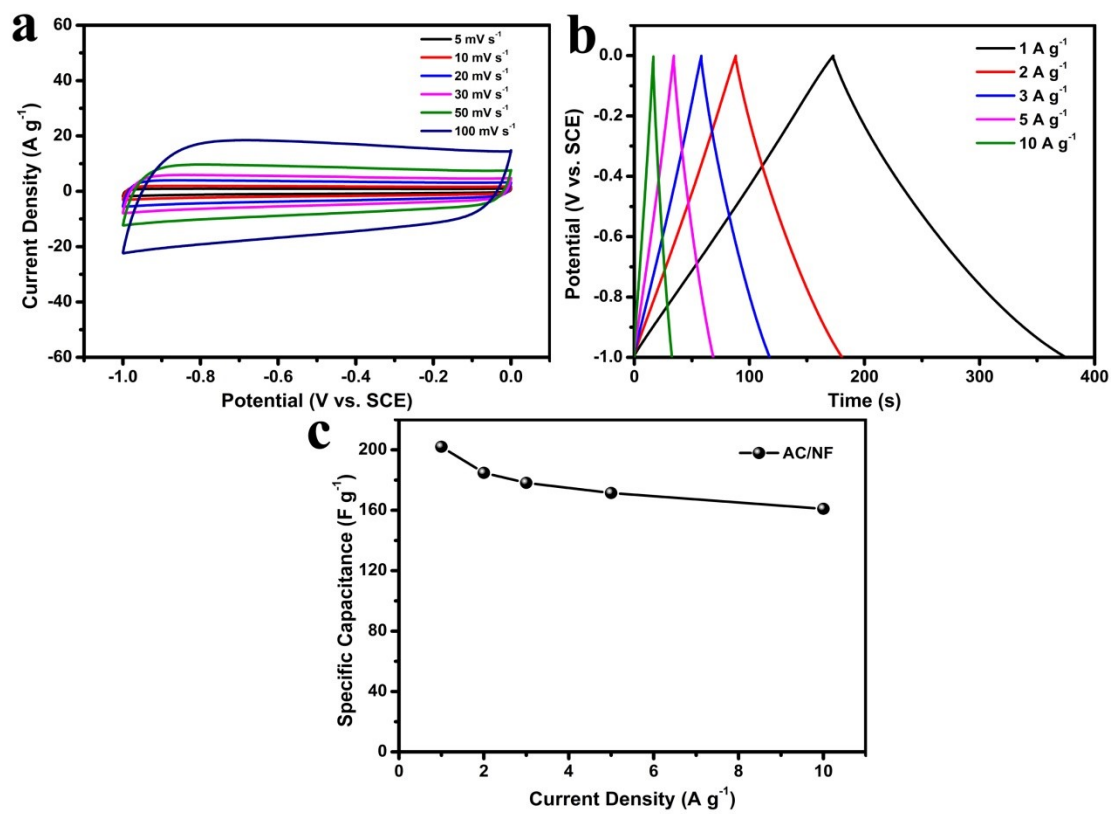

**Fig. S4** (a) CV curves of the AC at different scanning rates. (b) GCD curves of the AC at different current densities. (c) Specific capacitances of the AC at different current densities.
